# Supplementary material for: Promoting Well-Being in Students Through an Art-of-Living Intervention
Source: Atypon-hosted journal article supplement (doi:10.1027/2151-2604/a000501), 2022-07-01
Supplement: 2151-2604_a000501_esm1.pdf [file 2151-2604_a000501_esm1.pdf]

## Electronic Supplementary Material 1 for

Tavakoli, R., Müller, R., Jeske, E., Schäfbuch, N., & Schmitz, B. (2022). Promoting Well-Being in Students Through an Art-of-Living Intervention: Developing an Online Training for Eighth and Ninth Graders. *Zeitschrift für Psychologie*, 230. <https://doi.org/10.1027/2151-2604/a000501>

### Figure E1

*Screenshots of the First Exercise (Combined Group): A Good Sleep*

Seite 01

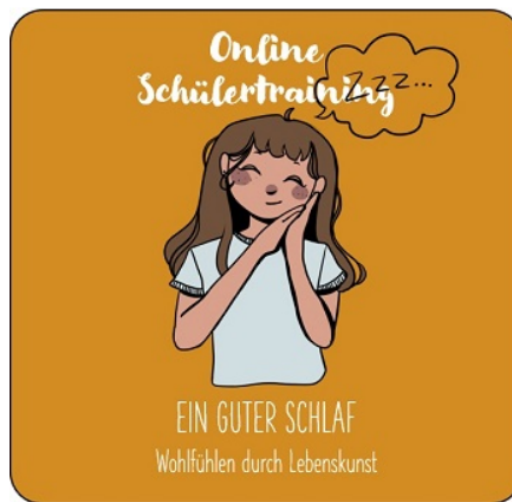

## TAG 1: EIN GUTER SCHLAF

*"Tu deinem Leib etwas Gutes, damit deine Seele Lust hat, darin zu wohnen." - Teresa von Avila*

**Willkommen zu deiner ersten Übung des Online-Schülertrainings. Wir freuen uns, dass du bei unserer Studie mitmachst.**

Wir werden dich im Laufe des Trainings bitten, über einige wichtige Dinge in deinem Leben nachzudenken. Es hilft immer, deine Gedanken aufzuschreiben. Darum sollst du in diesem Programm auf die Fragen, die wir dir stellen, in den vorgegebenen Feldern kurze Antworten geben (z.B. stichwortartig oder in kurzen Sätzen). Du kannst gerne immer Fotos oder Screenshots von den Aufgaben machen, damit du in Zukunft darauf zurückgreifen kannst.

In deiner ersten Übung geht es heute darum, die wichtigste Zeit der Entspannung und zum Kraft tanken zu verbessern: deinen Schlaf. Was hat mein Schlaf mit Lebenskunst und Wohlbefinden zutun, fragst du dich? Ein gesunder Geist steckt in einem gesunden Körper. Eine gute Voraussetzung dafür, dass es dir psychisch gut geht, ist, dass es deinem Körper gut geht. Ein erholsamer Schlaf ist dabei ganz wichtig, damit du am Tag genügend Energie hast und nicht müde und geschwächt bist.

Durch ein Schlafritual bereitest du deinen Körper optimal auf die Schlafphase vor. Suche dir eine der untenstehenden Übungen aus, die neu für dich ist. Eventuell hast du auch eigene Ideen, die du ausprobieren möchtest; diese kannst du auch gerne verwenden. Wichtig ist, dass die Übung dir gefällt und du sie in den kommenden sechs Tagen jeden Abend wiederholen kannst. Kurz vor dem Schlafengehen ist der beste Zeitpunkt dafür. Versuche, dich während des Rituals mit nichts anderem zu beschäftigen (also z.B. keine Whatsapp-Nachricht schreiben und nicht Fernsehen).

Beispiele für Schlafrituale:

- Lesen vor dem Einschlafen
- Wärmflasche mit ins Bett nehmen
- Schlummertrunk: Trinke eine kleine Tasse warme Milch mit Honig oder eine Tasse Tee (Aber Achtung: Kein Schwarz- oder Grüntee!)
- Höre beruhigende Musik (z.B. langsame und ruhige Lieder, Meeresrauschen, Waldgeräusche oder instrumentale Musik)
- Entspannungsübungen wie die *4-7-8-Methode* (unten steht, wie's geht)

Ein Ritual entsteht erst durch die die Regelmäßigkeit! Versuche, jeden Abend vor dem Schlafengehen an dein Ritual zu denken – nur so wird dein Körper das Ritual mit dem Schlafengehen verbinden. Dann wirst du schon bald feststellen, dass du ruhiger wirst und schneller einschläfst.

So funktioniert die *4-7-8-Methode*

Während der gesamten Übung berührt deine Zungenspitze die Erhöhung direkt hinter den Vorderzähnen.

1. Du atmest deine komplette Atemluft geräuschvoll durch den Mund aus.
2. Du schließt den Mund und atmest durch die Nase ein. Dabei zählst du innerlich bis *vier*.
3. Du hältst du den Atem an und zählst innerlich bis *sieben*.
4. Du atmest die komplette Atemluft geräuschvoll durch den geöffneten Mund aus und zählst dabei innerlich bis *acht*.
5. Diese Atemtechnik wiederholst du viermal.

#### Aufgabe a)

Für welches Schlafritual hast du dich entschieden? Wie willst du es genau umsetzen?

#### Aufgabe b)

Warum denkst du, dass dir das ausgewählte Ritual guttun könnte?

Wir bitten dich, dein ausgewähltes Schlafritual im Zeitraum des Trainings jeden Abend durchzuführen – fange gleich heute damit an. Schreibe dir am besten eine Erinnerung, damit du es nicht vergisst. Am Ende werden dich fragen, wie es funktioniert hat.

Wenn es dir gefällt und dir guttut, kannst du es natürlich auch nach dem Training beibehalten!

Viel Spaß beim Ausprobieren!

*Note: This exercise is targeted at the art-of-living component **bodily care**.*

## Figure E2

*Screenshots of the First Exercise (Cognitive Group): Achieving My Goals*

Seite 01

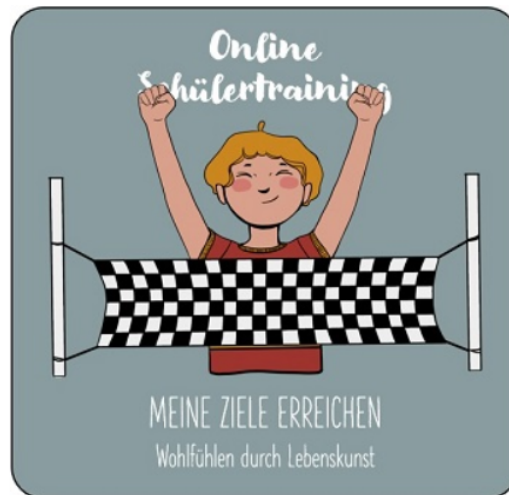

### TAG 1: MEINE ZIELE ERREICHEN

*"Du erreichst dein grosses Ziel, durch kleine Schritte in genau diese Richtung." - Ralph Schwarz*

**Willkommen zu deiner ersten Übung des Online-Schülertrainings. Wir freuen uns, dass du bei unserer Studie mitmachst.**

Wir werden dich im Laufe des Trainings bitten, über einige wichtige Dinge in deinem Leben nachzudenken. Es hilft immer, deine Gedanken aufzuschreiben. Darum sollst du in diesem Programm auf die Fragen, die wir dir stellen, in den vorgegebenen Feldern kurze Antworten geben.

Du kannst gerne immer Fotos oder Screenshots von den Aufgaben machen, damit du in Zukunft darauf zurückgreifen kannst.

Heute geht es darum, wie du ein Ziel von dir erreichen kannst. Vielleicht hättest du schon lange gerne etwas getan, wusstest aber nicht genau, wie. In dieser Übung sollst du dir genau überlegen, was du dafür tun musst, damit du eine klare Idee bekommst, wie du dein Ziel erreichen kannst. Du sollst dir bewusst machen, warum es sich lohnt, die möglichen Hindernisse, die deiner Zielerreichung im Weg stehen könnten, anzugehen. Dadurch sollst du auch die Motivation erhalten, es nun tatsächlich umzusetzen.

**Aufgabe a)**

Jeder hat ganz unterschiedliche persönliche Ziele mit einer ganz eigenen Begründung. Es kann ein größeres Projekt sein, dass du innerhalb dieses Jahres machen willst oder auch ein Plan, den du in kurzer Zeit umsetzen kannst.

In der Schule könnte ein Ziel z.B. sein, deine Mathenote zu verbessern oder dich in der Schülervertretung zu engagieren. Ein Ziel in deiner Freizeit könnte sein, dass du ein Instrument lernen oder auch mehr Sport machen willst.

Überlege dir zuerst, welches Ziel du gerne erreichen würdest und warum. Was ist deine Motivation?

**Mein Ziel:**

**Aufgabe b)**

Welche Hindernisse könnten dir bei der Umsetzung im Weg stehen? Warum hast du dein Ziel bisher noch nicht in Angriff genommen oder was stand dir eventuell im Weg, als du es versucht hast?

**Mögliche Hindernisse:**

**Aufgabe c)**

Überlege dir nun, was du konkret tun musst, um dein Ziel zu erreichen. Am effektivsten ist es, kleine Teilschritte aufzuschreiben. Dadurch erlebst du schneller Erfolge, wenn du versuchst, die einzelnen Schritte zu gehen.

Stelle dir vor, dass die Schritte einen Weg bilden, an dessen Ende dein Ziel auf dich wartet. Denke auch an die möglichen Hindernisse, die du gerade aufgeschrieben hast, und daran was du tun könntest, um sie aus dem Weg zu räumen.

Es kann hilfreich sein, zuerst alle möglichen Schritte aufzuschreiben und sie dann in eine Reihenfolge zu bringen. Schreibe die Schritte nacheinander in die Zeilen.

**Diese Schritte werde ich gehen:**

**Aufgabe d)**

Stelle dir jetzt vor, du hättest dein Ziel heute erreicht. Schließe dazu am besten die Augen. Wie würdest du dich dann fühlen?

**Das ist meine Belohnung:**

**Na dann, los!**

Warum fängst du nicht gleich an und gehst den ersten Schritt? Es wird sich lohnen!

**Super, du bist nun fertig mit der Übung. Zum Schluss interessiert uns noch, wie dir die Übung gefallen hat.**

Gib bitte an, wie sehr du der Aussage zustimmst. Deine ehrliche Meinung bringt uns am meisten – egal wie sie aussieht.

|                                                  | Stimme<br>überhaupt<br>nicht zu | Stimme<br>überwiegend<br>nicht zu | Stimme<br>eher<br>nicht zu | Teils-<br>teils       | Stimme<br>eher zu     | Stimme<br>überwiegend<br>zu | Stimme<br>voll zu     |
|--------------------------------------------------|---------------------------------|-----------------------------------|----------------------------|-----------------------|-----------------------|-----------------------------|-----------------------|
| Ich fand die Übung sinnvoll.                     | <input type="radio"/>           | <input type="radio"/>             | <input type="radio"/>      | <input type="radio"/> | <input type="radio"/> | <input type="radio"/>       | <input type="radio"/> |
| Mir hat die Übung Spaß gemacht.                  | <input type="radio"/>           | <input type="radio"/>             | <input type="radio"/>      | <input type="radio"/> | <input type="radio"/> | <input type="radio"/>       | <input type="radio"/> |
| Mir ist durch die Übung etwas klar(er) geworden. | <input type="radio"/>           | <input type="radio"/>             | <input type="radio"/>      | <input type="radio"/> | <input type="radio"/> | <input type="radio"/>       | <input type="radio"/> |

*Note:* This exercise is targeted at the art-of-living component *self-determined way of living*. In the following screenshots, the rating section is excluded since it is equivalent to the example above.

### Figure E3

*Screenshots of the Second Exercise (Cognitive and Combined Group): Good Mood List*

Seite 01  
Willkommen

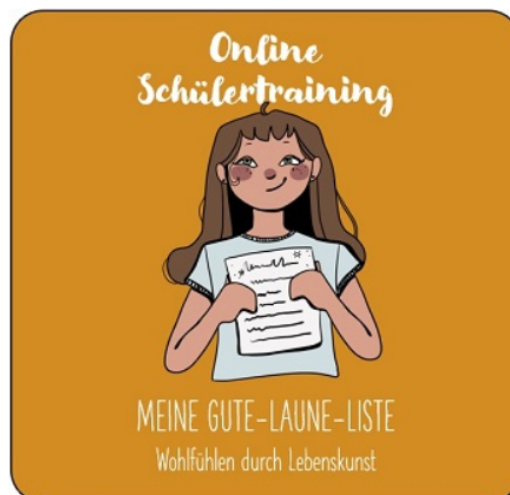

## TAG 2: MEINE GUTE-LAUNE-LISTE

*"Nichts in der Welt wirkt so ansteckend wie Lachen und gute Laune." - Charles Dickens.*

**Willkommen zurück zur zweiten Übung! Schön, dass du wieder da bist.**

Heute geht es um die Aktivitäten, Dinge und Personen, mit denen du gerne deine Zeit verbringst und die dir gute Laune bringen. Die Liste, die du erstellen sollst, kannst du z.B. nutzen, um in einer Situation, in der du dich nicht so gut fühlst, eine Idee zu kriegen, was du tun kannst, um den Tag wieder besser zu machen. Indem du dich an eine schöne Situation erinnerst, soll dir noch einmal bewusst werden, warum du die Aktivität toll findest und deine Wertschätzung verstärkt werden – und nebenbei kannst du gute Laune für den Tag tanken.

**Aufgabe a)**

Überlege dir bitte fünf Dinge, die dir gute Laune bereiten und deine Stimmung heben. Das kann alles Mögliche sein – ob Aktivitäten wie z.B. Sport machen oder Freunde treffen oder kreative Beschäftigungen wie Zeichnen oder ein Instrument spielen.

Trage deine persönlichen Gute-Laune-Dinge in den folgenden Feldern ein und notiere sie dir zusätzlich auf einem Blatt Papier. Wenn du schlechte Laune hast oder es dir nicht gut geht, kannst du immer auf die Liste schauen und überlegen was du machen könntest, damit es dir wieder besser geht.

**Was mir gute Laune bereitet:**

|    |                      |
|----|----------------------|
| 1. | <input type="text"/> |
| 2. | <input type="text"/> |
| 3. | <input type="text"/> |
| 4. | <input type="text"/> |
| 5. | <input type="text"/> |

**Aufgabe b)**

Schaue dir nun deine Liste an. Entscheide dich für eine Aktivität, an die du eine schöne Erinnerung hast. Lies dir zuerst die folgenden Fragen durch. Dann setze dich hin, schließe deine Augen, atme tief ein und denke an diese Erinnerung.

- Warst du mit jemandem zusammen?
- Was hast du/ habt ihr gemacht?
- Wo warst du und wie war das Wetter?
- Wie hast du dich gefühlt?

Du siehst die Bilder aus deinen Erinnerungen vor dir und fühlst dich in diesen Moment zurückgesetzt. Lass deine Gedanken in der Erinnerung schweben und fühle dich so, wie in diesem schönen Moment.

Öffne nach einiger Zeit deine Augen wieder – aber behalte das schöne Gefühl für den Rest des Tages bei.

Beschreibe bitte kurz, was deine Erinnerung war.

**Meine Gute-Laune-Erinnerung:**

|                      |
|----------------------|
| <input type="text"/> |
|----------------------|

*Note:* This exercise is targeted at the art-of-living component *self-knowledge*.

## Figure E4

*Screenshots of the Third Exercise (Cognitive and Combined Group): Getting to Know My Strengths*

Seite 01  
Willkommen

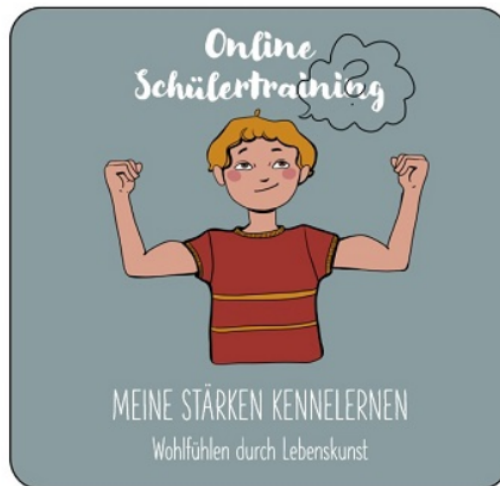

### **TAG 3: MEINE STÄRKEN KENNELERN**

*"Alle Stärke wird nur durch Hindernisse erkannt, die sie überwältigen kann." - Immanuel Kant*

**Willkommen zur dritten Übung. Schön, dass du wieder da bist.**

Heute geht es um deine persönlichen Stärken; um die Dinge, die du gut kannst. Einige deiner Eigenschaften hast du vielleicht noch gar nicht als Stärke betrachtet, während andere Personen diese Eigenschaft an dir sehr schätzen. Du sollst in dieser Übung deine Stärken herausstellen und bewusst wertschätzen. Sie sind ein Teil von dem, was dich ganz individuell ausmacht. Außerdem soll dir klar werden, dass sich Stärken entwickeln können und du, besonders durch Herausforderungen, neue ausbilden kannst.

**Aufgabe a)**

Oft erkennt man seine eigene Stärken erst daran, dass andere sie schätzen. Bei Teamaufgaben wird dir meistens die Aufgabe zugeteilt, von denen andere denken, dass du gut darin bist.

Erinnere dich bitte an vergangene Teamprojekte, an denen du teilgenommen hast. Dies können z.B. Referatsgruppen in der Schule, Freizeitprojekte mit Freunden oder in Sportgruppen sein. Überlege, welche Rolle du in diesem Team eingenommen hast. Warst du z.B. die Person, die die Organisation übernommen hat oder warst du für die gestalterischen Aufgaben zuständig?

Welches Projekt (oder welche Projekte) hast du im Kopf und welche Aufgaben hast du in der Gruppe übernommen, weil du besonders gut darin bist?

**Meine Stärken bei Teamarbeiten:**

Auf was warst du besonders stolz oder wobei hast du am meisten Lob bekommen?

**Aufgabe b)**

In welchen Dingen zählen deine Freunde oder deine Familie besonders auf dich?

**Aufgabe c)**

Was kannst du noch besonders gut? Erstelle jetzt eine Liste deiner Stärken. Das können z.B. Fähigkeiten wie Sprachenkenntnisse, Zeichnen, Computerkenntnisse oder Kochen sein, aber auch ein guter Umgang mit Menschen oder Tieren gehören dazu; genauso wie Mut, Kreativität, Durchsetzungsfähigkeit oder Humor.

Schreibe jede Stärke in eine eigene Zeile. Denke auch an die Stärken aus Aufgabe a) und b). Wenn dir kein guter Begriff für deine Stärke einfällt, dann beschreibe sie einfach in mehreren Worten.

**Meine Stärken-Liste:**

Am besten überträgst du deine Liste auf ein Blatt Papier, dann kannst du sie im Laufe der Zeit erweitern. Es ist gut, wenn du dir deine Stärken immer wieder in Erinnerung rufst, denn sie einzusetzen, erfüllt dich mit Freude und Stolz.

**Aufgabe d)**

Es kann aber auch Stärken geben, die du noch gar nicht oft gezeigt hast. Welche Stärke vermutest du in dir und in welcher Situation könntest du sie austesten?



## Deine Stärken wachsen

Stärken sind deine Eigenschaften, die du nutzen kannst, um Herausforderungen für dich und andere zu meistern. Wenn du die Möglichkeit hast, suche Situationen auf, in denen du deine Stärken nutzen und ausbauen kannst.

Versuche einmal, beim nächsten Projekt gezielt die Aufgaben zu übernehmen, in denen du deine Stärken siehst. Meistens machen solche Aktivitäten am meisten Spaß, bei denen du deine Stärken für deinen Erfolg oder den Erfolg der Gruppe einsetzen kannst. In solchen Situationen fühlt man sich oft besonders glücklich und produktiv. Außerdem kannst du deine Fähigkeiten so jederzeit noch weiter verbessern.

Es gibt aber auch noch Stärken in dir, die du noch gar nicht entdeckt hast und die sich erst im Laufe deines Lebens zeigen werden. Betrachte neue Aufgaben also immer auch als eine Chance, neue Stärken zu finden und zu entwickeln. Wer gezielt Stärken sucht, wird sie auch finden. Es lohnt sich, unbekannte Dinge auszuprobieren. Denke daran, dass es nicht schlimm ist, wenn du merkst, dass etwas nicht zu deinen Stärken gehört. Niemand kann in allem gut sein, das macht die Stärken erst besonders – und du hast ja eine Liste mit anderen Stärken!

*Note: This exercise is targeted at the art-of-living component *self-knowledge*.*

## Figure E5

*Screenshots of the Fourth Exercise (Cognitive and Combined Group): Managing Difficult Situations*

Seite 01  
Willkommen

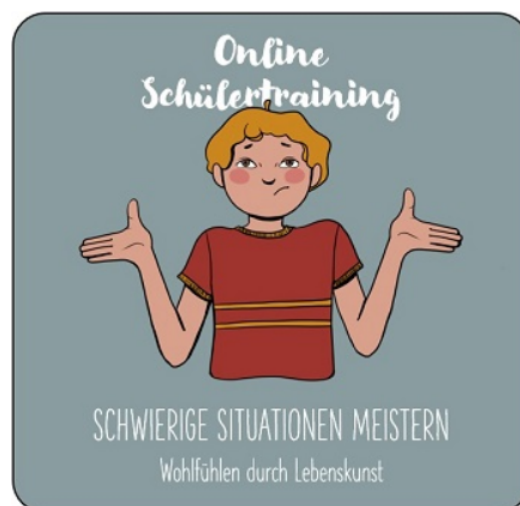

## TAG 4: SCHWIERIGE SITUATIONEN MEISTERN

*"Die schwierigste Zeit in unserem Leben ist die beste Gelegenheit, innere Stärke zu entwickeln." - Dalai Lama*

**Willkommen zur vierten Übung! Schön, dass du wieder da bist.**

Heute geht es um deinen Umgang mit schwierigen Situationen und deine Lösungswege, um sie zu meistern. Die Übung soll deine Zuversicht steigern, dass du mit Schwierigkeiten im Alltag umgehen kannst und sie nicht fürchten musst. Indem du dich an vergangene Situationen erinnerst, in denen du ein Hindernis überwunden hast, und dir weitere Möglichkeiten der Bewältigung überlegst, sollst du Kraft für zukünftige Herausforderungen tanken. Mithilfe von Bewältigungsstrategien und deiner Stärken kannst du alles schaffen.

**Aufgabe a)**

Warst du in deinem Leben schon einmal in einer schwierigen und stressigen Situation? Vielleicht musstest du eine Hausarbeit schreiben, die du sehr schwierig fandest. Oder du hattest einen schlimmen Streit mit einer Freundin oder einem Freund, der dich belastet hat. Ein anderes Beispiel könnte eine Aufgabe im Sportunterricht sein, die du dir erst nicht zugetraut hast.

Versuche dich jetzt an eine bestimmte Situation zu erinnern. Beschreibe bitte kurz, worum es ging.

**Aufgabe b)**

Konzentriere dich jetzt darauf, wie du diese Situationen überwunden hast. Wie hast du es geschafft, das Problem zu lösen?

- Was hast du genau getan?
- Welche deiner Eigenschaften haben dir dabei geholfen? (Eigenschaften können z.B. Ehrgeiz, Offenheit oder Teamfähigkeit sein.)
- Was hast du eventuell versucht, was zuerst nicht erfolgreich war?

**Aufgabe c)**

Welche anderen Möglichkeiten könnte es geben, eine solche oder ähnliche Situationen zu überwinden? Was würdest du tun, wenn du jetzt in einer solchen Situation wärst?

*Note:* This exercise is targeted at the art-of-living component *coping*.

## Figure E6

*Screenshots of the Fifth Exercise (Cognitive and Combined Group): My Friends and Family*

Seite 01  
Willkommen

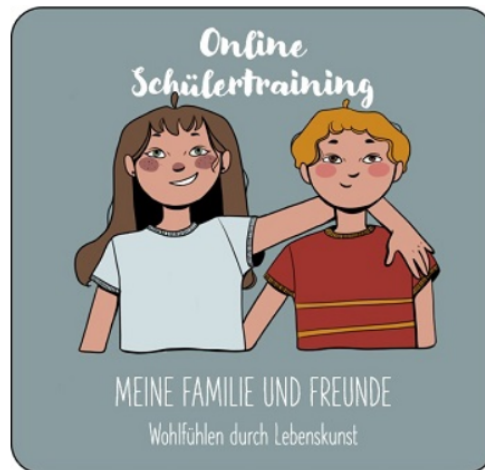

### **TAG 5: MEINE FAMILIE UND FREUNDE**

*„Im Grunde sind es doch die Verbindungen mit Menschen, die dem Leben seinen Wert geben.“ - Wilhelm von Humboldt*

**Willkommen zurück zur fünften Übung! Schön, dass du wieder da bist.**

Heute geht es um die Menschen in deinem Leben, auf die du immer zählen kannst. Du sollst dir darüber klar werden, dass du in jeder schwierigen Situation Freunde oder Familienmitglieder hast, die dir weiterhelfen können. Die Liste, die du in dieser Übung erstellen sollst, kannst du in Zukunft hervorholen, wenn du in einer schwierigen Situation Unterstützung brauchst, um zu sehen, wessen Unterstützung dir helfen könnte. Viele scheinbare Probleme lassen sich schon dadurch klären, indem du dich an eine vertraute Person wendest.

**Aufgabe a)**

Als Erstes sollst du eine Liste von Freunden und Familienmitgliedern erstellen, von denen du weißt, dass sie immer für dich da sind. Schreibe so viele Personen auf (z.B. mit Vornamen oder ihrer Rolle, wie „Mama“), wie du möchtest. Schreibe dazu in jede Zeile eine Person.

Es geht nicht darum, dass die Liste lang ist, sondern dass du dir über die wertvollen Menschen bewusst wirst!

**Auf diese Menschen kann ich immer zählen:**

|  |
|--|
|  |
|  |
|  |

Mache am besten ein Foto/ einen Screenshot von der Liste oder schreibe sie auf einen extra Zettel, damit du in Zukunft auf sie zurückgreifen kannst.

**Aufgabe b)**

Auf welche Weise können diese Menschen dir in schwierigen Situationen helfen? Solch eine Situation könnte z.B. ein Streit oder ein schulisches Problem sein. Was haben sie in der Vergangenheit bereits konkret getan, um dich zu unterstützen und was kannst du dir sonst vorstellen?

Schreibe Stichworte auf (z.B. Umarmen, Ratschlag geben, Mut machen, ...).

|  |
|--|
|  |
|--|

**Aufgabe c)**

Erinnere dich jetzt bitte an eine schwierige Situation, in der du Rat oder Hilfe von einer vertrauten Person gebraucht hast.

Um was ging es und an wen hast du dich gewandt?

|  |
|--|
|  |
|--|

Wie hat die Person dir geholfen? (Hat sie dir einen Rat gegeben, dir Mut gemacht, dich emotional unterstützt, ...?)

|  |
|--|
|  |
|--|

Wie hast du dich im Vergleich zu vorher gefühlt, nachdem die Person dir geholfen hat?

|  |
|--|
|  |
|--|

*Note:* This exercise is targeted at the art-of-living component  *coping*.

## Figure E7

*Screenshots of the Sixth Exercise (Combined Group): Savouring Consciously*

Seite 01

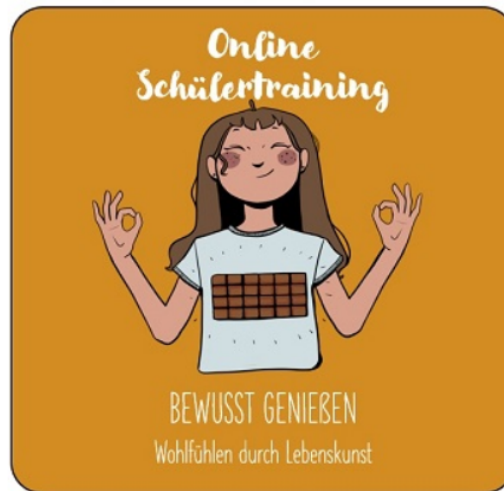

### **TAG 6: BEWUSST GENIEßEN**

*"Kein Genuss ist vorübergehend; denn der Eindruck, den er zurücklässt, ist bleibend." - Johann Wolfgang von Goethe*

**Willkommen zur sechsten und letzten Übung! Wir freuen uns, dass du bis jetzt mitgemacht hast und wünschen dir viel Spaß beim letzten Teil!**

Deine letzte Übung beschäftigt sich mit Genuss, denn dieser ist ein wichtiger Bestandteil des Lebens. Heute sollst du deine ganze Aufmerksamkeit auf etwas richten, was dir sehr gut schmeckt. Beim Genießen geht es allein um das gute Gefühl und die Wertschätzung der Sache, die dir den Genuss bringt.

Das Ziel dieser Übung ist es, sich aktiv auf den Genuss zu konzentrieren und für einen Moment an nichts anderes zu denken – so als würdest du das Leben für einen Augenblick verlangsamen. Mit der Zeit und ein wenig Übung wirst du lernen, dein Genusserleben zu verbessern und dadurch langfristig dein Wohlbefinden zu steigern.

**Aufgabe a)**

Genuss gibt es in vielen verschiedenen Arten: z.B. Musik hören, in der Sonne liegen, Parfum riechen oder etwas Leckeres schmecken. Um Letzteres geht es in der heutigen Übung. Allerdings wirst du deinen Lieblingssnack heute nicht gierig in dich hineinstopfen, sondern aktiv genießen! Du wirst deine ganze Aufmerksamkeit auf deine selbst ausgewählte Süßigkeit richten und den Geschmack viel intensiver wahrnehmen.

Überlege dir, was du gerne knabberst. Das kann z.B. Schokolade sein; Erdbeeren, Nüsse oder Gummibärchen. Hole dir jetzt deinen Lieblingssnack.

Der nachfolgende Text wird dir nun Schritt für Schritt sagen, was du mit deinem ausgewählten Snack tun sollst. Lies dir als Erstes die folgenden Schritte einmal durch, bevor du sie ausführst. Die Aufgaben mögen dir ein wenig ungewohnt vorkommen, aber lasse dich bitte einfach mal darauf ein.

**\*Schritt 1\***

- Lege deine ausgewählte Süßigkeit bzw. das Obst auf deinen Handrücken. Wie fühlt es sich an (kalt, warm, nass, etc.)?
- Streiche mit den Fingern darüber.
- Führe deine Hand zur Nase und rieche dran. Hat es einen eigenen Geruch oder ist es neutral?

**\*Schritt 2\***

- Führe deinen Handrücken zum Mund und lecke mit der Zunge über deinen Snack. Kannst du schon etwas schmecken? Lass dir Zeit.
- Beiße nun ein kleines Stück ab und lasse es auf deiner Zunge umherwandern (von links nach rechts, nach vorne, nach hinten). Merkst du einen geschmacklichen Unterschied an den verschiedenen Orten der Zunge? Konzentriere dich alleine auf den Geschmack.

**\*Schritt 3\***

- Nimm nun den Rest deiner Süßigkeit/ des Obststücks in den Mund. Aber noch nicht kauen! Verändert sich die Konsistenz und die Form durch die Wärme deiner Zunge? Richte deine Aufmerksamkeit nur auf die Konsistenz und die eventuelle Veränderung.
- Wenn sich nach 20 Sekunden nichts verändert hat, darfst du nun langsam kauen. Lass dir Zeit und genieße es; es ist dein Lieblingssnack! Schiebe die Masse auf den Bereich der Zunge, wo du den Geschmack vorher am intensivsten wahrgenommen hast.
- Wenn du alles klein gekaut hast, schlucke es runter. Wie ist der Nachgeschmack?

**Aufgabe b)**

Welchen Lieblingssnack hast du für diese Übung ausgewählt?

Welche Gedanken sind dir während der Übung durch den Kopf gegangen?

Hast du etwas wahrgenommen, worauf du sonst nicht geachtet hast? Was ist dir aufgefallen?

*Note: This exercise is targeted at the art-of-living component **savoring**.*

## Figure E8

*Screenshots of the Sixth Exercise (Cognitive Group): Applying My Strengths*

Seite 01

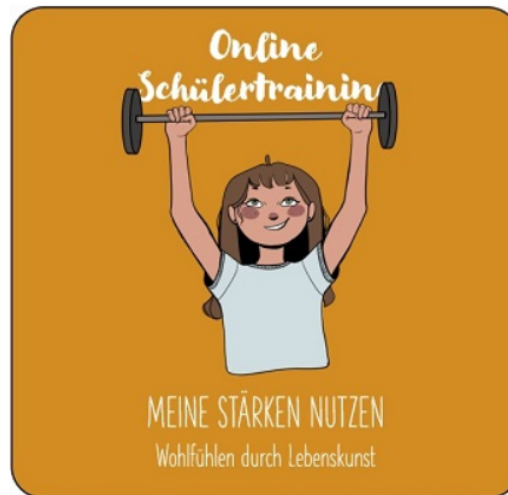

### **TAG 6: MEINE STÄRKEN NUTZEN**

*"Wer mit seinen Stärken arbeitet, wird stärker." - Ingo Krawiec*

**Willkommen zur sechsten und letzten Übung! Wir freuen uns, dass du bis jetzt mitgemacht hast und wünschen dir viel Spaß beim letzten Teil!**

Zum Schluss geht es heute darum, Wege zu finden, deine Stärken zu nutzen, um dein Leben (noch weiter) zu verbessern. Du sollst erkennen, dass es oft in deiner Hand liegt, Situationen zu gestalten und für dich und andere zu verbessern. Indem du eine bestimmte Situation betrachtest und konkret überlegst, wie du sie mithilfe deiner Stärken selber ändern könntest, sollst du das Bewusstsein aufbauen, dass du oft aus eigener Kraft heraus etwas verändern kannst, mit dem du nicht glücklich bist.

**Aufgabe a)**

Überlege dir, womit du zurzeit unzufrieden bist. Die Situation muss nicht total schlecht sein; es kann auch Aspekte geben, die eigentlich schon gut sind, während du andere verbessern willst. Das kann z.B. deine Schulleistung sein, Unordentlichkeit, deine Beziehung zu einer Person, deine Freizeitgestaltung oder eine wahrgenommene Ungerechtigkeit. Warum bist du mit dieser Situation unzufrieden? Was stört dich daran?

**Eine Situation, die ich gerne verbessern würde und warum:**

**Aufgabe b)**

Stelle dir nun vor, dass die Situation ideal wäre; genauso wie du es dir wünschst. Wie müsste die Situation dann aussehen? Beschreibe bitte die neuen Umstände/ das Verhalten der beteiligten Personen/ dein Verhalten. Wie würdest du dich fühlen?

**So wäre ich am glücklichsten mit der Situation:**

**Aufgabe c)**

Denke jetzt darüber nach, wie du selbst diese Situation in Richtung deiner Idealvorstellung ändern könntest. Überlege dir verschiedene Möglichkeiten für Dinge, die du selber tun könntest.

- Könntest du dein Verhalten ändern? Was müsstest du tun?
- Könntest du deine Sichtweise auf die Situation ändern? Wie würde es dich glücklicher machen?
- Könntest du mit den beteiligten Personen sprechen? Was könntest du sagen?

**Das könnte ich tun, um die Situation zu verbessern:**

**Aufgabe d)**

Du hast dir in der dritten Übung bereits Gedanken darüber gemacht, was du gut kannst und wo deine persönlichen Stärken liegen. Wie könnten deine Stärken dir bei der Verbesserung der Situation helfen? Könnte eine deiner Stärken (oder auch mehrere) hilfreich bei der Umsetzung der Möglichkeiten aus Aufgabe c) sein?

**Diese Stärken könnten mir dabei helfen:**

## Deine Stärken für andere einsetzen

Auf die gleiche Art und Weise kannst du natürlich auch jederzeit versuchen, deine Stärken einzusetzen, um anderen zu helfen, Situationen zu verbessern, mit denen sie unzufrieden sind. Deine Stärken sind auch dadurch besonders, dass vermutlich viele andere in dieser Sache nicht ganz so gut sind wie du. Während dir z.B. das Sprachenlernen oder das Präsentationshalten besonders leichtfallen, gibt es einen anderen, der sich bestimmt freut, wenn du ihm hilfst, sich zu verbessern. Wenn du deine Stärken für andere einsetzt, wirst du spüren, wie wertvoll deine Stärken sind – das kann besonders glücklich machen.



*Note:* This exercise is targeted at the art-of-living component *self-determined way of living*.
