# Supplementary material for: Promoting Well-Being in Students Through an Art-of-Living Intervention
Source: Atypon-hosted journal article supplement (doi:10.1027/2151-2604/a000501), 2022-07-01
Supplement: 2151-2604_a000501_esm2.pdf [file 2151-2604_a000501_esm2.pdf]

**Electronic Supplementary Material 2 for**

**Tavakoli, R., Müller, R., Jeske, E., Schäfbuch, N., & Schmitz, B. (2022). Promoting Well-Being in Students Through an Art-of-Living Intervention: Developing an Online Training for Eighth and Ninth Graders. *Zeitschrift für Psychologie*, 230. <https://doi.org/10.1027/2151-2604/a000501>**

**Table E1**

*Demographic Characteristics of the Sample for Each Condition and Point of Measurement*

| Condition            | Participants |          | Gender |          |       |          | Age       |          | Grade <sup>a</sup> |          |       |  |
|----------------------|--------------|----------|--------|----------|-------|----------|-----------|----------|--------------------|----------|-------|--|
|                      |              |          | Female |          | Male  |          |           |          | 8                  |          | 9     |  |
|                      | <i>n</i>     | <i>n</i> | %      | <i>n</i> | %     | <i>M</i> | <i>SD</i> | <i>n</i> | %                  | <i>n</i> | %     |  |
| Pretest and posttest |              |          |        |          |       |          |           |          |                    |          |       |  |
| Cognitive            | 24           | 17       | 71.83  | 7        | 29.17 | 13.96    | 0.55      | 19       | 79.17              | 4        | 16.67 |  |
| Combined             | 26           | 22       | 84.62  | 4        | 15.38 | 13.96    | 0.53      | 19       | 73.08              | 7        | 26.92 |  |
| Control              | 19           | 15       | 78.95  | 4        | 21.05 | 14.00    | 0.54      | 15       | 78.95              | 4        | 26.67 |  |
| Total                | 69           | 54       | 78.26  | 15       | 21.74 | 13.97    | 0.54      | 53       | 76.81              | 15       | 21.74 |  |
| Follow-up            |              |          |        |          |       |          |           |          |                    |          |       |  |
| Cognitive            | 16           | 12       | 75.00  | 4        | 25    | 14.00    | 0.52      | 12       | 75.00              | 3        | 18.75 |  |
| Combined             | 21           | 17       | 80.95  | 4        | 19.05 | 14.00    | 0.45      | 15       | 71.43              | 6        | 28.57 |  |
| Total                | 37           | 29       | 78.33  | 8        | 21.67 | 14.00    | 0.49      | 27       | 73.00              | 9        | 24.32 |  |

*Note:* The participants were randomly assigned to one of the training conditions (cognitive or combined) or the wait list control group.

<sup>a</sup> One participant in the cognitive group did not indicate their grade.
